# Supplementary material for: Investigation of the long-term sustainability of changes in appetite after weight loss
Source: PubMed Central journal article supplement (PMC6113192; doi:10.1038/s41366-018-0119-9), 2018-06-21
Supplement: 41366_2018_119_MOESM1_ESM.pdf [file 41366_2018_119_MOESM1_ESM.pdf]

Supplementary table I. Physical activity levels over time in all participants, males and females

|                                   | Baseline         | Week 13                     | 6 months                       | 1 year                        |
|-----------------------------------|------------------|-----------------------------|--------------------------------|-------------------------------|
| <b>Average MET (kcal/kg/hour)</b> |                  |                             |                                |                               |
| All                               | 1.20 ± 0.02      | 1.33 ± 0.030 <sup>***</sup> | 1.34 ± 0.030 <sup>***</sup>    | 1.29 ± 0.02 <sup>**</sup>     |
| Males                             | 1.28 ± 0.04      | 1.42 ± 0.04 <sup>h</sup>    | 1.42 ± 0.04 <sup>h</sup>       | 1.37 ± 0.04                   |
| Females                           | 1.13 ± 0.03      | 1.23 ± 0.05                 | 1.26 ± 0.05 <sup>¥</sup>       | 1.21 ± 0.03 <sup>¥¥</sup>     |
| <b>SedTime (min/day)</b>          |                  |                             |                                |                               |
| All                               | 1134.98 ± 15.43  | 1111.33 ± 18.68             | 1105.94 ± 18.14                | 1119.15 ± 15.25               |
| Males                             | 1113.23 ± 23.66  | 1078.46 ± 24.29             | 1096.95 ± 24.60                | 1101.46 ± 23.46               |
| Females                           | 1156.05 ± 20.01  | 1163.07 ± 31.53             | 1109.06 ± 27.67                | 1137.60 ± 19.74               |
| <b>LightAct (min/day)</b>         |                  |                             |                                |                               |
| All                               | 216.07 ± 12.29   | 241.84 ± 15.14              | 232.29 ± 14.67                 | 230.90 ± 12.13                |
| Males                             | 212.60 ± 18.79   | 250.81 ± 19.34              | 229.65 ± 19.61                 | 214.17 ± 18.61                |
| Females                           | 219.96 ± 15.86   | 210.36 ± 25.80              | 230.80 ± 22.50                 | 243.34 ± 15.62                |
| <b>ModAct (min/day)</b>           |                  |                             |                                |                               |
| All                               | 69.90 ± 7.42     | 74.73 ± 9.44                | 96.06 ± 9.10                   | 82.82 ± 7.30                  |
| Males                             | 92.18 ± 11.44    | 95.32 ± 11.83               | 126.94 ± 12.03                 | 112.23 ± 11.30                |
| Females                           | 46.49 ± 9.62     | 61.74 ± 16.55               | 62.37 ± 14.27                  | 54.54 ± 9.45                  |
| <b>VigAct (min/day)</b>           |                  |                             |                                |                               |
| All                               | 0.81 ± 1.16      | 4.43 ± 1.52                 | 6.71 ± 1.46 <sup>**</sup>      | 3.48 ± 1.14                   |
| Males                             | 1.18 ± 1.80      | 6.44 ± 1.86                 | 6.22 ± 1.90                    | 4.97 ± 1.77                   |
| Females                           | 0.31 ± 1.51      | 0.84 ± 2.69                 | 7.95 ± 2.30 <sup>¥</sup>       | 2.20 ± 1.48                   |
| <b>TotalPA (min/day)</b>          |                  |                             |                                |                               |
| All                               | 288.17 ± 13.50   | 315.35 ± 16.28              | 326.87 ± 15.82                 | 292.61 ± 13.35                |
| Males                             | 305.13 ± 20.70   | 349.85 ± 21.25              | 350.11 ± 21.51                 | 322.21 ± 20.53                |
| Females                           | 268.76 ± 17.51   | 266.80 ± 27.47              | 303.51 ± 24.14                 | 264.10 ± 17.29                |
| <b>StepsDay</b>                   |                  |                             |                                |                               |
| All                               | 6650.35 ± 389.73 | 7111.89 ± 468.70            | 8600.74 ± 455.75 <sup>**</sup> | 7883.77 ± 385.49              |
| Males                             | 6198.86 ± 598.77 | 6915.94 ± 614.45            | 8553.78 ± 621.87               | 7820.95 ± 593.96 <sup>l</sup> |
| Females                           | 7026.84 ± 506.58 | 7276.78 ± 791.01            | 8528.31 ± 695.72               | 7984.04 ± 500.14              |

Results presented as estimated marginal means±SEM. MET; Metabolic Equivalent of Task. Act; activity. Mod; moderate. Vig; vigorous/very vigorous. PA; physical activity. Min; minutes. Symbols denote significant differences from baseline (for all participants <sup>\*\*\*</sup>P<0.001 and <sup>\*\*</sup>P<0.01, males <sup>h</sup>P<0.01 and <sup>l</sup>P<0.05, and females <sup>¥¥</sup>P<0.01 and <sup>¥</sup>P<0.05).
